# Supplementary material for: Structure and immune recognition of trimeric pre-fusion HIV-1 Env
Source: Springer Nature journal article supplement (doi:10.1038/nature13808), 2014-10-01
Supplement: 41586_2014_BFnature13808_MOESM79_ESM.pdf [file 41586_2014_BFnature13808_MOESM79_ESM.pdf]

## Supplementary Table 1 | Interface of gp120 and gp41 in the HIV-1 viral spike.

### a. gp120-gp41 interface within the same protomer.

| Disulfide bond, Hydrogen bonds and salt bridges |               |          |               |      |               |          |               |
|-------------------------------------------------|---------------|----------|---------------|------|---------------|----------|---------------|
| Type                                            | gp120         | Dist.[Å] | gp41          | Type | gp120         | Dist.[Å] | gp41          |
| D*                                              | G:CYS501[SG]  | 2.03     | B:CYS605[SG]  | H    | G:VAL36[O]    | 3.44     | B:THR606[N]   |
| H                                               | G:VAL36[N]    | 3.23     | B:VAL608[O]   | H    | G:VAL38[O]    | 3.44     | B:CYS604[N]   |
| H                                               | G:VAL38[N]    | 3.23     | B:CYS604[O]   | H    | G:GLY41[O]    | 2.85     | B:GLN540[NE2] |
| H                                               | G:TYR40[N]    | 2.78     | B:LEU602[O]   | H    | G:ILE491[O]   | 2.47     | B:ARG585[NH2] |
| H                                               | G:GLY222[N]   | 3.32     | B:LEU544[O]   | H    | G:LEU494[O]   | 3.69     | B:TYR643[OH]  |
| H                                               | G:CYS501[SG]  | 2.03     | B:CYS605[SG]  | H    | G:VAL496[O]   | 3.01     | B:TRP631[NE1] |
| H                                               | G:ARG503[N]   | 3.69     | B:ASN607[OD1] | H    | G:PRO498[O]   | 3.22     | B:TRP623[NE1] |
| H                                               | G:ARG503[NE]  | 2.77     | B:CYS605[O]   | S    | G:ARG503[NH1] | 3.66     | B:GLU654[OE1] |
| H                                               | G:ARG503[NH1] | 3.66     | B:GLU654[OE1] | S    | G:ARG503[NH1] | 3.77     | B:GLU654[OE2] |
| H                                               | G:ARG503[NH2] | 3.88     | B:ASN651[OD1] | S    | G:ARG503[NH2] | 3.31     | B:GLU654[OE2] |
| H                                               | G:ARG503[NH2] | 3.31     | B:GLU654[OE2] | S    | G:ASP107[OD1] | 3.88     | B:LYS574[NZ]  |
| H                                               | G:LEU34[O]    | 3.27     | B:TRP610[N]   |      |               |          |               |

### List of interface residues (the residues on each row are not matched interactive partners)

| gp120    | HSD* | ASA    | BSA    | ΔiG   | gp41     | HSD | ASA    | BSA    | ΔiG   |
|----------|------|--------|--------|-------|----------|-----|--------|--------|-------|
| G:GLU32  |      | 159.45 | 4.30   | -0.05 | B:LEU520 |     | 121.69 | 21.75  | -0.12 |
| G:ASN33  |      | 89.08  | 2.66   | 0.01  | B:GLY521 |     | 26.76  | 8.18   | 0.13  |
| G:LEU34  | H    | 110.93 | 77.87  | 0.76  | B:PHE522 |     | 97.67  | 71.75  | 0.51  |
| G:TRP35  |      | 100.83 | 63.15  | 1.01  | B:LEU523 |     | 109.67 | 109.67 | 1.53  |
| G:VAL36  | H    | 114.66 | 114.66 | 1.46  | B:GLY524 |     | 27.66  | 25.36  | -0.07 |
| G:THR37  |      | 30.75  | 25.23  | 0.40  | B:ALA525 |     | 10.37  | 5.95   | 0.03  |
| G:VAL38  | H    | 106.47 | 104.98 | 0.87  | B:ALA526 |     | 41.11  | 39.96  | 0.64  |
| G:TYR39  |      | 105.81 | 81.77  | 1.01  | B:GLY527 |     | 69.79  | 56.29  | 0.37  |
| G:TYR40  | H    | 179.40 | 176.84 | 0.80  | B:SER528 |     | 36.71  | 6.97   | 0.02  |
| G:GLY41  | H    | 56.83  | 56.83  | 0.14  | B:MET530 |     | 4.02   | 4.02   | 0.06  |
| G:VAL42  |      | 35.68  | 35.68  | 0.53  | B:ALA533 |     | 9.35   | 9.35   | 0.10  |
| G:PRO43  |      | 120.19 | 120.19 | 1.42  | B:SER534 |     | 34.69  | 8.52   | 0.07  |
| G:VAL44  |      | 65.52  | 61.67  | 0.99  | B:THR536 |     | 14.87  | 0.67   | 0.01  |
| G:TRP45  |      | 54.65  | 44.97  | 0.41  | B:LEU537 |     | 55.20  | 46.56  | 0.64  |
| G:LYS46  |      | 120.67 | 43.68  | -0.47 | B:GLN540 | H   | 43.31  | 43.31  | 0.39  |
| G:THR50  |      | 25.14  | 5.03   | -0.06 | B:ALA541 |     | 51.42  | 26.04  | 0.38  |
| G:THR51  |      | 113.45 | 69.78  | 0.90  | B:ASN543 |     | 67.50  | 4.04   | -0.05 |
| G:LEU52  |      | 17.22  | 12.82  | -0.13 | B:LEU544 | H   | 101.31 | 92.14  | 0.99  |
| G:PHE53  |      | 85.28  | 39.95  | 0.64  | B:LEU545 |     | 73.00  | 8.28   | -0.06 |
| G:CYS54  |      | 42.46  | 32.07  | 0.95  | B:SER546 |     | 84.70  | 8.33   | 0.08  |
| G:ALA70  |      | 37.95  | 31.06  | 0.24  | B:THR569 |     | 176.82 | 10.29  | 0.01  |
| G:THR71  |      | 14.13  | 1.57   | 0.00  | B:VAL570 |     | 125.76 | 35.73  | 0.57  |
| G:HIS72  |      | 121.47 | 5.88   | 0.06  | B:TRP571 |     | 220.73 | 156.50 | 1.92  |
| G:ALA73  |      | 96.56  | 29.12  | 0.24  | B:GLY572 |     | 37.57  | 18.36  | 0.29  |
| G:CYS74  |      | 23.63  | 7.73   | 0.17  | B:LYS574 | S   | 152.09 | 82.95  | 0.70  |
| G:VAL75  |      | 78.47  | 11.55  | 0.18  | B:GLN575 |     | 92.61  | 41.82  | 0.67  |
| G:ILE84  |      | 99.58  | 66.43  | 1.06  | B:GLN577 |     | 134.10 | 6.02   | 0.10  |
| G:HIS85  |      | 78.96  | 1.35   | -0.02 | B:ALA578 |     | 57.70  | 53.73  | 0.71  |
| G:LEU86  |      | 30.31  | 29.33  | 0.47  | B:ARG579 |     | 151.60 | 3.66   | 0.05  |
| G:GLU87  |      | 119.82 | 18.20  | -0.05 | B:LEU581 |     | 110.03 | 27.96  | 0.45  |
| G:ASN88  |      | 153.77 | 33.19  | 0.03  | B:ALA582 |     | 40.33  | 33.52  | 0.50  |
| G:VAL89  |      | 37.55  | 31.55  | 0.50  | B:ARG585 | H   | 143.40 | 111.70 | -1.49 |
| G:GLU91  |      | 30.92  | 4.37   | -0.07 | B:TYR586 |     | 44.47  | 4.86   | 0.07  |
| G:GLN103 |      | 36.99  | 3.93   | 0.03  | B:ARG588 |     | 110.32 | 8.29   | -0.25 |
| G:THR106 |      | 80.82  | 1.23   | -0.01 | B:ASP589 |     | 57.71  | 54.89  | 0.08  |
| G:ASP107 | S    | 61.19  | 45.56  | -0.27 | B:GLN590 |     | 43.04  | 13.39  | -0.15 |
| G:SER110 |      | 55.55  | 0.37   | -0.00 | B:LEU592 |     | 49.31  | 7.70   | 0.12  |
| G:LEU111 |      | 27.14  | 6.17   | 0.10  | B:LEU593 |     | 45.47  | 42.80  | 0.68  |
| G:GLN114 |      | 120.33 | 31.88  | -0.10 | B:TRP596 |     | 31.12  | 29.58  | 0.47  |
| G:ILE215 |      | 13.89  | 7.54   | 0.12  | B:GLY597 |     | 27.87  | 21.33  | 0.10  |
| G:PRO220 |      | 41.14  | 34.13  | 0.55  | B:CYS598 |     | 28.15  | 7.27   | 0.30  |
| G:ALA221 |      | 100.15 | 84.00  | 0.92  | B:LYS601 |     | 100.71 | 9.72   | 0.16  |
| G:GLY222 | H    | 45.99  | 42.17  | 0.36  | B:LEU602 | H   | 109.20 | 36.90  | -0.19 |
| G:PHE223 |      | 53.56  | 40.21  | 0.53  | B:ILE603 |     | 132.63 | 27.62  | 0.44  |
| G:ALA224 |      | 16.56  | 15.06  | 0.24  | B:CYS604 | H   | 51.21  | 33.54  | 0.02  |
| G:LEU226 |      | 2.85   | 2.85   | 0.05  | B:CYS605 | HD  | 122.91 | 92.60  | 2.38  |

\*. D: Disulfide bond, H: Hydrogen bond, S: Salt bridge.

ASA: Accessible Surface Area, Å<sup>2</sup>, BSA: Buried Surface Area, Å<sup>2</sup>, ΔiG: Solvation energy effect, kcal/mol, ||||: Buried area percentage, one bar per 10%.

| gp120    | HSD* | ASA    | BSA    | $\Delta iG$ | gp41     | HSD | ASA    | BSA    | $\Delta iG$ |
|----------|------|--------|--------|-------------|----------|-----|--------|--------|-------------|
| G:THR244 |      | 24.69  | 21.63  | 0.25        | B:THR606 | H   | 50.11  | 49.65  | -0.26       |
| G:GLN246 |      | 85.27  | 1.22   | -0.02       | B:ASN607 | H   | 124.12 | 79.55  | -0.46       |
| G:VAL489 |      | 0.34   | 0.34   | 0.01        | B:VAL608 | H   | 37.64  | 31.45  | -0.08       |
| G:LYS490 |      | 73.37  | 17.59  | 0.25        | B:PRO609 |     | 117.67 | 28.85  | 0.45        |
| G:ILE491 | H    | 61.56  | 61.56  | 0.58        | B:TRP610 | H   | 120.54 | 93.20  | 1.27        |
| G:GLU492 |      | 66.22  | 16.94  | 0.16        | B:TRP614 |     | 17.78  | 1.72   | 0.03        |
| G:PRO493 |      | 36.83  | 35.49  | 0.57        | B:ARG617 |     | 120.66 | 11.78  | -0.13       |
| G:LEU494 | H    | 126.36 | 110.93 | 1.37        | B:ASN618 |     | 90.29  | 5.61   | -0.03       |
| G:GLY495 |      | 22.28  | 16.59  | 0.26        | B:LEU619 |     | 122.62 | 80.84  | 1.19        |
| G:VAL496 | H    | 111.77 | 105.32 | 1.09        | B:ILE622 |     | 19.73  | 18.90  | 0.30        |
| G:ALA497 |      | 40.47  | 40.47  | 0.64        | B:TRP623 | H   | 88.48  | 63.25  | 0.83        |
| G:PRO498 | H    | 85.23  | 85.23  | 0.85        | B:TRP628 |     | 104.58 | 102.71 | 1.60        |
| G:THR499 |      | 44.62  | 19.72  | 0.20        | B:LEU629 |     | 134.49 | 88.15  | 1.41        |
| G:ARG500 |      | 189.46 | 32.79  | -0.35       | B:TRP631 | H   | 28.70  | 24.25  | -0.01       |
| G:CYS501 | HD   | 74.02  | 24.28  | 0.81        | B:ASP632 |     | 83.43  | 62.02  | -0.30       |
| G:LYS502 |      | 140.46 | 28.75  | 0.46        | B:LYS633 |     | 159.78 | 16.90  | 0.27        |
| G:ARG503 | HS   | 206.15 | 158.06 | -1.47       | B:ILE635 |     | 7.69   | 5.85   | 0.09        |
| G:ARG504 |      | 207.48 | 14.46  | -0.16       | B:SER636 |     | 54.68  | 6.70   | 0.11        |
| G:VAL505 |      | 195.08 | 15.78  | 0.23        | B:THR639 |     | 37.06  | 7.68   | 0.12        |
|          |      |        |        |             | B:ILE642 |     | 28.01  | 28.01  | 0.45        |
|          |      |        |        |             | B:TYR643 | H   | 80.82  | 41.37  | -0.04       |
|          |      |        |        |             | B:LEU646 |     | 21.93  | 21.76  | 0.35        |
|          |      |        |        |             | B:GLN650 |     | 19.52  | 1.36   | -0.01       |
|          |      |        |        |             | B:ASN651 | H   | 21.14  | 1.12   | -0.01       |
|          |      |        |        |             | B:GLU654 | HS  | 92.77  | 24.69  | -0.32       |
|          |      |        |        |             | B:LEU661 |     | 124.01 | 16.57  | 0.27        |

Glycan-peptide interactions (interactive partners are shaded)

| gp120     | HSD* | ASA    | BSA   | $\Delta iG$ | gp41      | HSD | ASA    | BSA   | $\Delta iG$ |
|-----------|------|--------|-------|-------------|-----------|-----|--------|-------|-------------|
| G:NAG1088 | H    | 361.66 | 73.01 | -1.75       | B:LEU520  |     | 121.69 | 16.40 | 0.26        |
|           |      |        |       |             | B:GLY524  |     | 27.66  | 1.84  | -0.02       |
|           |      |        |       |             | B:GLY527  |     | 69.79  | 11.56 | 0.01        |
|           |      |        |       |             | B:SER528  | H   | 36.71  | 27.04 | -0.12       |
| G:NAG1089 |      | 351.65 | 3.07  | -0.04       | B:THR529  |     | 40.42  | 0.86  | -0.01       |
|           |      |        |       |             | B:ALA532  |     | 46.96  | 2.35  | 0.04        |
| G:GLU32   |      | 159.45 | 39.08 | -0.38       | B:NAG1618 |     | 364.26 | 36.79 | -0.53       |
| G:ARG500  |      | 189.46 | 4.52  | -0.05       |           |     |        |       |             |

b. gp41-gp41 interface between two protomers.

Hydrogen bonds and salt bridges

| Type | Protomer 1    | Dist.[Å] | Protomer 2    | Type | Protomer 1    | Dist.[Å] | Protomer 2    |
|------|---------------|----------|---------------|------|---------------|----------|---------------|
| H*   | B:THR538[N]   | 3.25     | N:GLN652[OE1] | H    | B:ARG542[O]   | 3.70     | N:GLN591[NE2] |
| H    | B:THR538[OG1] | 3.34     | N:GLU647[O]   | H    | B:LYS601[O]   | 2.99     | N:LYS655[NZ]  |
| H    | B:ARG579[NH2] | 3.66     | N:GLN577[O]   | S    | B:ARG579[NE]  | 3.91     | N:GLU584[OE1] |
| H    | B:SER534[O]   | 3.04     | N:GLN652[NE2] | S    | B:ARG579[NE]  | 3.81     | N:GLU584[OE2] |
| H    | B:MET535[SD]  | 3.18     | N:ASN656[ND2] | S    | B:ARG579[NH1] | 3.66     | N:GLU584[OE1] |
| H    | B:ALA541[O]   | 2.60     | N:GLN591[NE2] |      |               |          |               |

List of interface residues (the residues on each row are not matched interactive partners)

| Protomer 1 | HSD* | ASA    | BSA   | $\Delta iG$ | Protomer 2 | HSD | ASA    | BSA   | $\Delta iG$ |
|------------|------|--------|-------|-------------|------------|-----|--------|-------|-------------|
| B:PHE519   |      | 186.83 | 42.66 | 0.68        | N:VAL570   |     | 126.21 | 2.34  | 0.04        |
| B:SER534   | H    | 34.69  | 13.07 | -0.07       | N:ILE573   |     | 93.94  | 22.94 | 0.37        |
| B:MET535   | H    | 156.91 | 40.14 | 0.81        | N:LEU576   |     | 82.58  | 20.67 | 0.33        |
| B:LEU537   |      | 55.20  | 6.31  | 0.09        | N:GLN577   | H   | 134.57 | 53.69 | 0.09        |
| B:THR538   | H    | 75.83  | 69.24 | 0.30        | N:VAL580   |     | 67.81  | 44.79 | 0.72        |
| B:ALA541   | H    | 51.42  | 23.75 | 0.04        | N:LEU581   |     | 110.02 | 15.40 | 0.25        |
| B:ARG542   | H    | 146.72 | 59.48 | 0.51        | N:VAL583   |     | 66.78  | 10.55 | 0.17        |
| B:LEU545   |      | 73.00  | 56.46 | 0.90        | N:GLU584   | S   | 106.22 | 87.36 | -0.21       |
| B:SER546   |      | 84.70  | 0.73  | -0.01       | N:ARG585   |     | 143.08 | 0.17  | 0.00        |
| B:GLY547   |      | 117.72 | 55.99 | 0.31        | N:LEU587   |     | 110.12 | 85.18 | 1.31        |

\*. D: Disulfide bond, H: Hydrogen bond, S: Salt bridge.

ASA: Accessible Surface Area, Å<sup>2</sup>, BSA: Buried Surface Area, Å<sup>2</sup>,  $\Delta iG$ : Solvation energy effect, kcal/mol, |||||: Buried area percentage, one bar per 10%.

| Protomer 1 | HSD* | ASA    | BSA   | $\Delta iG$ | Protomer 2 | HSD | ASA    | BSA    | $\Delta iG$ |
|------------|------|--------|-------|-------------|------------|-----|--------|--------|-------------|
| B:THR569   |      | 176.82 | 2.47  | -0.03       | N:ARG588   |     | 110.89 | 34.82  | 0.55        |
| B:GLY572   |      | 37.57  | 0.61  | -0.01       | N:GLN590   |     | 42.98  | 2.39   | -0.02       |
| B:ILE573   |      | 94.88  | 15.39 | 0.25        | N:GLN591   | H   | 117.50 | 107.20 | -0.48       |
| B:GLN575   |      | 92.61  | 12.96 | -0.15       | N:LEU592   |     | 48.64  | 3.52   | 0.06        |
| B:LEU576   |      | 83.59  | 62.75 | 1.00        | N:GLY594   |     | 29.76  | 21.20  | 0.21        |
| B:ARG579   | HS   | 151.60 | 91.09 | -0.97       | N:ILE595   |     | 63.30  | 59.10  | 0.89        |
| B:VAL580   |      | 68.80  | 23.47 | 0.38        | N:SER599   |     | 77.41  | 18.41  | -0.01       |
| B:VAL583   |      | 66.76  | 51.19 | 0.82        | N:GLU647   | H   | 69.63  | 48.68  | -0.26       |
| B:TYR586   |      | 44.47  | 28.29 | 0.11        | N:GLU648   |     | 126.06 | 52.30  | 0.16        |
| B:LEU587   |      | 110.38 | 25.61 | 0.41        | N:ASN651   |     | 20.57  | 11.32  | 0.05        |
| B:SER599   |      | 76.87  | 6.95  | -0.05       | N:GLN652   | H   | 118.71 | 94.27  | -0.62       |
| B:GLY600   |      | 48.68  | 17.81 | 0.29        | N:LYS655   | H   | 119.03 | 86.36  | -0.78       |
| B:LYS601   | H    | 100.71 | 68.22 | -0.56       | N:ASN656   | H   | 84.63  | 43.02  | -0.41       |
| B:LEU602   |      | 109.20 | 68.18 | 1.09        | N:GLN658   |     | 112.11 | 4.37   | 0.02        |
| B:ILE603   |      | 132.63 | 71.19 | 1.04        | N:ASP659   |     | 92.31  | 28.16  | -0.10       |
| B:CYS605   |      | 122.91 | 30.32 | 1.24        | N:ALA662   |     | 81.10  | 14.85  | 0.24        |

c. gp120-gp120 interface between two protomers.

| Hydrogen bonds |               |          |               |      |               |          |             |
|----------------|---------------|----------|---------------|------|---------------|----------|-------------|
| Type           | Protomer 1    | Dist.[Å] | Protomer 2    | Type | Protomer 1    | Dist.[Å] | Protomer 2  |
| H*             | G:ARG166[N]   | 3.53     | M:CYS126[O]   | H    | G:ARG308[NH2] | 2.51     | M:ASN197[O] |
| H              | G:ARG166[NH1] | 3.12     | M:THR162[OG1] | H    | G:ASP167[OD1] | 2.82     | M:THR128[N] |

List of interface residues (the residues on each row are not matched interactive partners)

| Protomer 1 | HSD* | ASA    | BSA   | $\Delta iG$ | Protomer 2 | HSD | ASA    | BSA   | $\Delta iG$ |
|------------|------|--------|-------|-------------|------------|-----|--------|-------|-------------|
| G:LYS121   |      | 125.83 | 1.05  | -0.04       | M:LYS121   |     | 124.12 | 1.05  | -0.04       |
| G:GLU164   |      | 60.11  | 32.69 | 0.27        | M:THR123   |     | 86.16  | 17.50 | 0.04        |
| G:LEU165   |      | 121.56 | 88.67 | 1.42        | M:PRO124   |     | 50.39  | 29.08 | 0.47        |
| G:ARG166   | H    | 232.85 | 96.11 | 0.02        | M:CYS126   | H   | 58.84  | 57.67 | 0.69        |
| G:ASP167   | H    | 112.65 | 53.43 | -0.30       | M:VAL127   |     | 50.15  | 40.17 | 0.64        |
| G:LYS168   |      | 169.18 | 6.94  | 0.03        | M:THR128   | H   | 84.95  | 48.41 | 0.61        |
| G:ARG308   | H    | 154.00 | 41.66 | -0.61       | M:ASN160   |     | 66.98  | 1.80  | -0.01       |
| G:PRO313   |      | 113.91 | 95.17 | 1.22        | M:THR162   | H   | 61.82  | 28.15 | -0.17       |
| G:GLY314   |      | 80.10  | 34.53 | 0.35        | M:ILE184   |     | 86.42  | 10.72 | 0.17        |
| G:GLN315   |      | 69.99  | 5.43  | -0.06       | M:GLU190   |     | 65.42  | 1.60  | -0.05       |
|            |      |        |       |             | M:TYR191   |     | 11.33  | 0.24  | -0.00       |
|            |      |        |       |             | M:ARG192   |     | 53.70  | 22.11 | 0.35        |
|            |      |        |       |             | M:CYS196   |     | 37.27  | 36.90 | -0.17       |
|            |      |        |       |             | M:ASN197   | H   | 100.94 | 44.59 | 0.18        |
|            |      |        |       |             | M:THR198   |     | 75.16  | 6.04  | -0.02       |
|            |      |        |       |             | M:SER199   |     | 23.86  | 21.46 | 0.23        |
|            |      |        |       |             | M:ALA200   |     | 72.04  | 35.32 | 0.43        |
|            |      |        |       |             | M:ILE201   |     | 6.81   | 1.97  | 0.02        |

Glycan-peptide interactions (interactive partners are shaded)

| Protomer 1 | HSD* | ASA    | BSA   | $\Delta iG$ | Protomer 2 | HSD | ASA    | BSA   | $\Delta iG$ |
|------------|------|--------|-------|-------------|------------|-----|--------|-------|-------------|
| G:ASP167   |      | 112.65 | 11.41 | -0.19       | M:NAG1160  |     | 357.88 | 10.91 | -0.36       |
| G:ARG308   |      | 154.00 | 36.82 | -0.89       | M:NAG1197  |     | 357.46 | 36.02 | -1.02       |

d. gp120-gp41 interface between two protomers.

List of interface residues (the residues on each row are not matched interactive partners)

| Protomer 1 | HSD* | ASA    | BSA   | $\Delta iG$ | Protomer 2 | HSD | ASA    | BSA   | $\Delta iG$ |
|------------|------|--------|-------|-------------|------------|-----|--------|-------|-------------|
| G:ALA31    |      | 96.84  | 2.91  | -0.00       | N:GLN591   |     | 117.50 | 1.89  | -0.02       |
| G:THR37    |      | 30.75  | 3.85  | 0.06        | N:GLN658   |     | 112.11 | 21.55 | -0.25       |
| G:TYR39    |      | 105.81 | 8.33  | -0.10       | N:ASP659   |     | 92.31  | 47.80 | -0.54       |
| G:TYR40    |      | 179.40 | 2.13  | -0.00       | N:ALA662   |     | 81.10  | 39.46 | 0.21        |
| G:THR499   |      | 44.62  | 12.18 | 0.00        | N:LEU663   |     | 135.17 | 73.02 | 0.91        |
| G:ARG500   |      | 189.46 | 55.45 | -0.49       |            |     |        |       |             |
| G:CYS501   |      | 74.02  | 49.74 | 1.65        |            |     |        |       |             |

\*. D: Disulfide bond, H: Hydrogen bond, S: Salt bridge.

ASA: Accessible Surface Area, Å<sup>2</sup>, BSA: Buried Surface Area, Å<sup>2</sup>,  $\Delta iG$ : Solvation energy effect, kcal/mol, ||||: Buried area percentage, one bar per 10%.

| Protomer 1 | HSD* | ASA | BSA | $\Delta iG$ | Protomer 2 | HSD | ASA | BSA | $\Delta iG$ |
|------------|------|-----|-----|-------------|------------|-----|-----|-----|-------------|
|------------|------|-----|-----|-------------|------------|-----|-----|-----|-------------|

|          |        |       |       |
|----------|--------|-------|-------|
| G:LYS502 | 140.46 | 19.36 | -0.22 |
| G:ARG503 | 206.15 | 0.17  | 0.00  |
| G:ARG504 | 207.48 | 22.43 | -0.52 |

\*, D: Disulfide bond, H: Hydrogen bond, S: Salt bridge.

ASA: Accessible Surface Area, Å<sup>2</sup>, BSA: Buried Surface Area, Å<sup>2</sup>, ΔiG: Solvation energy effect, kcal/mol, ||||: Buried area percentage, one bar per 10%.

**Supplementary Table 2 | DALI structural comparison.**

| Target                       | Chain  | Z   | rmsd | lali | nres | %id PDB | Description                                    |
|------------------------------|--------|-----|------|------|------|---------|------------------------------------------------|
| gp41 monomer                 | 3FF6-D | 3   | 4.9  | 74   | 733  | 9 PDB   | ACETYL-COA CARBOXYLASE 2                       |
|                              | 4JLE-B | 2.6 | 8.1  | 66   | 159  | 6 PDB   | PHIST                                          |
|                              | 4B4C-A | 2.3 | 4.1  | 66   | 187  | 6 PDB   | CHROMODOMAIN-HELICASE-DNA-BINDING              |
| gp41+gp120 N and C (monomer) | 4B4C-A | 2.1 | 3.8  | 66   | 1876 | PDB     | CHROMODOMAIN-HELICASE-DNA-BINDING              |
|                              | 3GTY-X | 2   | 6.3  | 89   | 4127 | PDB     | TRIGGER FACTOR                                 |
| gp41+gp120 N and C (trimer)  | 1QOY-A | 2.6 | 4.5  | 114  | 3036 | PDB     | HEMOLYSIN E                                    |
|                              | 3ZYM-C | 2.5 | 5.1  | 110  | 2807 | PDB     | PHOSPHATIDYLINOSITOL-BINDING CLATHRIN ASSEMBLY |
|                              | 1HX8-A | 2.1 | 9    | 104  | 2708 | PDB     | SYNAPSE-ENRICHED CLATHRIN ADAPTOR PROTEIN LAP  |
|                              | 3ZYK-A | 2   | 4.5  | 109  | 2695 | PDB     | PHOSPHATIDYLINOSITOL-BINDING CLATHRIN ASSEMBLY |

Target: gp41

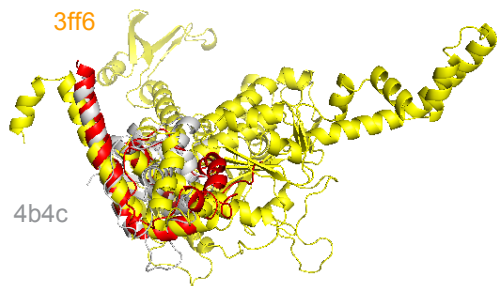

Target: gp41+gp120 N and C

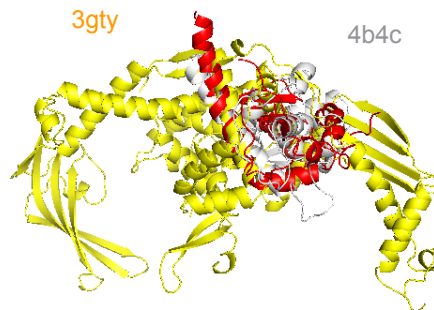

Target: gp41+gp120 N and C (Trimer)

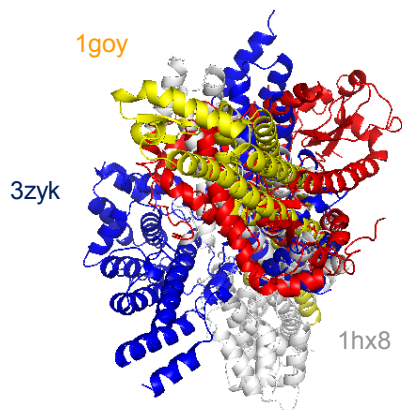

Supplementary Table 3 | 35O22 interface with HIV-1 Env.

a. 35O22 heavy chain (chain D) and light chain (chain E) interface with gp41 (chain B)

| Hydrogen bonds |               |          |             |   |             |          |            |
|----------------|---------------|----------|-------------|---|-------------|----------|------------|
|                | gp41          | Dist.[Å] | 35O22       |   | gp41        | Dist.[Å] | 35O22      |
| 1              | B:ASN625[ND2] | 3.68     | D:LEU96[O]  | 3 | B:ASP624[O] | 3.04     | D:ARG98[N] |
| 2              | B:ASN625[OD1] | 2.44     | D:TYR32[OH] | 4 | B:ASP624[O] | 3.20     | D:ASP99[N] |

List of heavy chain-gp41 interface residues (the residues on each row are not matched interactive partners)

| gp41     | HSD* | ASA    | BSA   | ΔiG   | 35O22    | HSD | ASA    | BSA   | ΔiG   |
|----------|------|--------|-------|-------|----------|-----|--------|-------|-------|
| B:GLY527 |      | 69.79  | 18.98 | -0.13 | D:GLN1   |     | 192.89 | 29.65 | -0.35 |
| B:SER528 |      | 36.71  | 4.59  | 0.07  | D:PHE31  |     | 63.18  | 12.09 | 0.19  |
| B:THR529 |      | 40.42  | 37.31 | 0.24  | D:TYR32  | H   | 53.73  | 25.90 | -0.26 |
| B:ALA532 |      | 46.96  | 3.52  | 0.06  | D:PHE72H |     | 169.27 | 95.44 | 1.53  |
| B:ARG617 |      | 120.66 | 26.65 | -0.70 | D:LEU96  | H   | 56.05  | 5.65  | -0.06 |
| B:SER620 |      | 73.21  | 21.28 | -0.18 | D:LEU97  |     | 90.59  | 68.55 | 1.10  |
| B:GLU621 |      | 86.31  | 8.52  | 0.14  | D:ARG98  | H   | 153.80 | 71.96 | -0.38 |
| B:ASP624 | H    | 98.64  | 66.75 | -0.11 | D:ASP99  | H   | 118.53 | 47.77 | 0.22  |
| B:ASN625 | H    | 112.81 | 73.74 | -0.54 | D:GLY100 |     | 52.83  | 5.97  | 0.10  |
| B:MET626 |      | 7.75   | 2.28  | 0.02  |          |     |        |       |       |
| B:THR627 |      | 29.84  | 21.28 | 0.24  |          |     |        |       |       |
| B:LEU629 |      | 134.49 | 18.20 | 0.21  |          |     |        |       |       |
| B:GLN630 |      | 99.10  | 36.41 | 0.35  |          |     |        |       |       |

List of light chain-gp41 interface residues (the residues on each row are not matched interactive partners)

| gp41     | HSD | ASA    | BSA   | ΔiG   | 35O22   | HSD | ASA    | BSA   | ΔiG   |
|----------|-----|--------|-------|-------|---------|-----|--------|-------|-------|
| B:LYS633 |     | 159.78 | 17.24 | -0.05 | E:TYR49 |     | 74.12  | 32.70 | -0.26 |
| B:ARG617 |     | 120.66 | 2.47  | -0.09 | E:GLU50 |     | 85.57  | 7.34  | -0.10 |
| B:ASN618 |     | 90.29  | 18.66 | -0.16 | E:GLU53 |     | 71.21  | 16.28 | -0.02 |
| B:SER620 |     | 73.21  | 36.85 | 0.27  | E:ARG54 |     | 115.05 | 11.48 | -0.13 |
| B:GLU621 |     | 86.31  | 58.39 | -0.27 | E:PRO56 |     | 129.25 | 36.15 | 0.58  |

b. 35O22 interface with gp41 glycans (chain B)

Light chain residues interacting with gp41 glycan NAG1618

| 35O22   | HSD | ASA    | BSA   | ΔiG   | gp41      | HSD | ASA    | BSA    | ΔiG   |
|---------|-----|--------|-------|-------|-----------|-----|--------|--------|-------|
| E:TYR49 |     | 74.12  | 2.84  | -0.03 | B:NAG1618 |     | 364.26 | 155.97 | -2.95 |
| E:ASN52 |     | 101.39 | 14.60 | -0.07 |           |     |        |        |       |
| E:GLU53 |     | 71.21  | 40.20 | 0.28  |           |     |        |        |       |
| E:ARG54 |     | 115.05 | 60.92 | -1.06 |           |     |        |        |       |
| E:ALA55 |     | 8.17   | 3.50  | -0.03 |           |     |        |        |       |
| E:PRO56 |     | 129.25 | 1.01  | 0.02  |           |     |        |        |       |
| E:ILE58 |     | 36.63  | 3.56  | -0.04 |           |     |        |        |       |

c. 35O22 heavy chain (chain D) and light chain (chain E) interface with gp120 (chain G)

Hydrogen bonds

|   | gp120        | Dist.[Å] | 35O22        |   | gp120        | Dist.[Å] | 35O22        |
|---|--------------|----------|--------------|---|--------------|----------|--------------|
| 1 | G:GLU87[OE2] | 3.47     | D:TYR53[OH]  | 4 | G:THR90[O]   | 2.67     | D:SER72G[OG] |
| 2 | G:ASN88[O]   | 3.52     | D:ARG28[NH1] | 5 | G:THR90[OG1] | 3.19     | D:ARG28[NH1] |
| 3 | G:ASN88[O]   | 3.57     | D:ARG28[NH2] | 6 | G:GLU92[OE2] | 3.66     | D:SER72G[N]  |

List of heavy chain-gp120 interface residues (the residues on each row are not matched interactive partners)

| gp120    | HSD* | ASA    | BSA   | ΔiG   | 35O22    | HSD | ASA    | BSA   | ΔiG   |
|----------|------|--------|-------|-------|----------|-----|--------|-------|-------|
| G:GLU87  | H    | 119.82 | 30.03 | -0.04 | D:ARG28  | H   | 61.56  | 41.29 | -0.86 |
| G:ASN88  | H    | 153.77 | 76.82 | -0.45 | D:ASN30  |     | 36.89  | 0.67  | 0.01  |
| G:VAL89  |      | 37.55  | 0.16  | 0.00  | D:PHE31  |     | 63.18  | 29.42 | 0.47  |
| G:THR90  | H    | 84.18  | 78.15 | 0.06  | D:TYR53  | H   | 174.22 | 57.23 | 0.43  |
| G:GLU91  |      | 30.92  | 6.18  | -0.07 | D:GLU72B |     | 31.31  | 3.07  | -0.05 |
| G:GLU92  | H    | 120.15 | 37.29 | -0.20 | D:PRO72D |     | 100.81 | 68.72 | 0.94  |
| G:PRO238 |      | 84.68  | 52.14 | 0.79  | D:VAL72E |     | 95.12  | 16.09 | -0.14 |
| G:PRO240 |      | 94.84  | 25.90 | 0.41  | D:THR72F |     | 81.85  | 25.64 | 0.19  |
|          |      |        |       |       | D:SER72G | H   | 84.96  | 55.39 | 0.12  |
|          |      |        |       |       | D:ARG98  |     | 153.80 | 14.44 | -0.15 |

\*. D: Disulfide bond, H: Hydrogen bond, S: Salt bridge.

ASA: Accessible Surface Area, Å<sup>2</sup>, BSA: Buried Surface Area, Å<sup>2</sup>, ΔiG: Solvation energy effect, kcal/mol, |||||: Buried area percentage, one bar per 10%.

## d. 35O22 heavy chain (chain D) and light chain (chain E) interface with gp120 glycans (chain G)

| Hydrogen bonds |                |          |               |    |              |          |               |
|----------------|----------------|----------|---------------|----|--------------|----------|---------------|
|                | 35O22          | Dist.[Å] | gp120         |    | 35O22        | Dist.[Å] | gp120         |
| 1              | D:ARG98[NH1]   | 3.15     | G:NAG1088[O5] | 12 | E:HIS93[ND1] | 3.70     | G:BMA1090[O4] |
| 2              | D:ARG98[NH1]   | 3.20     | G:NAG1088[O6] | 13 | E:ASN94[ND2] | 2.90     | G:MAN1092[O5] |
| 3              | D:HIS33[NE2]   | 3.19     | G:NAG1089[O3] | 14 | E:ASN94[ND2] | 2.98     | G:MAN1092[O6] |
| 4              | D:THR100C[OG1] | 3.79     | G:NAG1089[O3] |    |              |          |               |
| 5              | D:SER52[OG]    | 2.81     | G:NAG1089[O7] |    |              |          |               |
| 6              | D:ASP99[OD2]   | 2.69     | G:NAG1089[O6] |    |              |          |               |
| 7              | D:THR100C[OG1] | 3.64     | G:BMA1090[O2] |    |              |          |               |
| 8              | D:GLY100[N]    | 3.81     | G:MAN1091[O6] |    |              |          |               |
| 9              | D:ASP99[OD2]   | 2.89     | G:MAN1091[O6] |    |              |          |               |
| 10             | D:ASN58[ND2]   | 2.75     | G:MAN1093[O5] |    |              |          |               |
| 11             | D:LYS57[O]     | 2.83     | G:MAN1093[O6] |    |              |          |               |

| Heavy chain residues interacting with gp120 glycans (interactive partners are shaded) |      |        |       |       |           |     |        |        |       |
|---------------------------------------------------------------------------------------|------|--------|-------|-------|-----------|-----|--------|--------|-------|
| 35O22                                                                                 | HSD* | ASA    | BSA   | ΔiG   | gp120     | HSD | ASA    | BSA    | ΔiG   |
| D:ASN30                                                                               |      | 36.89  | 3.80  | -0.04 | G:NAG1088 | H   | 361.66 | 152.80 | -2.90 |
| D:PHE31                                                                               |      | 63.18  | 14.73 | 0.21  |           |     |        |        |       |
| D:SER52                                                                               |      | 14.76  | 4.10  | -0.05 |           |     |        |        |       |
| D:TYR53                                                                               |      | 174.22 | 56.84 | 0.60  |           |     |        |        |       |
| D:ARG98                                                                               | H    | 153.80 | 34.95 | 0.09  |           |     |        |        |       |
| D:ASN30                                                                               |      | 36.89  | 3.30  | -0.04 | G:NAG1089 | H   | 351.65 | 208.97 | -3.87 |
| D:PHE31                                                                               |      | 63.18  | 6.93  | 0.03  |           |     |        |        |       |
| D:TYR32                                                                               |      | 53.73  | 2.88  | 0.04  |           |     |        |        |       |
| D:HIS33                                                                               | H    | 31.99  | 27.65 | -0.34 |           |     |        |        |       |
| D:SER52                                                                               | H    | 14.76  | 10.65 | -0.10 |           |     |        |        |       |
| D:PRO52A                                                                              |      | 21.95  | 0.17  | 0.00  |           |     |        |        |       |
| D:TYR53                                                                               |      | 174.22 | 15.13 | 0.24  |           |     |        |        |       |
| D:SER54                                                                               |      | 79.25  | 0.49  | -0.01 |           |     |        |        |       |
| D:LEU97                                                                               |      | 90.59  | 0.34  | -0.00 |           |     |        |        |       |
| D:ARG98                                                                               |      | 153.80 | 29.55 | 0.07  |           |     |        |        |       |
| D:ASP99                                                                               | H    | 118.53 | 28.74 | -0.23 |           |     |        |        |       |
| D:GLY100                                                                              |      | 52.83  | 1.75  | -0.02 |           |     |        |        |       |
| D:THR100C                                                                             | H    | 23.46  | 9.80  | 0.07  |           |     |        |        |       |
| D:HIS33                                                                               |      | 31.99  | 0.87  | -0.03 | G:BMA1090 | H   | 290.20 | 66.73  | -1.33 |
| D:TRP50                                                                               |      | 35.25  | 6.06  | 0.10  |           |     |        |        |       |
| D:ASP56                                                                               |      | 82.09  | 5.52  | -0.03 |           |     |        |        |       |
| D:ARG98                                                                               |      | 153.80 | 2.90  | -0.03 |           |     |        |        |       |
| D:ASP99                                                                               |      | 118.53 | 8.40  | -0.05 |           |     |        |        |       |
| D:GLY100                                                                              |      | 52.83  | 16.78 | -0.19 |           |     |        |        |       |
| D:SER100A                                                                             |      | 115.04 | 3.65  | 0.06  |           |     |        |        |       |
| D:THR100C                                                                             | H    | 23.46  | 13.65 | 0.07  |           |     |        |        |       |
| D:TRP100D                                                                             |      | 96.11  | 0.78  | 0.01  |           |     |        |        |       |
| D:ASP99                                                                               | H    | 118.53 | 22.92 | -0.26 | G:MAN1091 | H   | 291.06 | 83.96  | -1.30 |
| D:GLY100                                                                              | H    | 52.83  | 24.33 | -0.02 |           |     |        |        |       |
| D:SER100A                                                                             |      | 115.04 | 21.29 | 0.32  |           |     |        |        |       |
| D:TRP50                                                                               |      | 35.25  | 13.76 | 0.22  | G:MAN1092 |     | 291.10 | 71.20  | -1.09 |
| D:ASP56                                                                               |      | 82.09  | 35.67 | -0.24 |           |     |        |        |       |
| D:LYS57                                                                               |      | 97.21  | 1.59  | -0.02 |           |     |        |        |       |
| D:ASN58                                                                               |      | 70.22  | 15.87 | -0.07 |           |     |        |        |       |
| D:TRP50                                                                               |      | 35.25  | 1.77  | 0.03  | G:MAN1093 | H   | 291.76 | 65.49  | -0.59 |
| D:ASP56                                                                               |      | 82.09  | 6.71  | -0.08 |           |     |        |        |       |
| D:LYS57                                                                               | H    | 97.21  | 14.49 | -0.17 |           |     |        |        |       |
| D:ASN58                                                                               | H    | 70.22  | 37.81 | -0.30 |           |     |        |        |       |
| D:GLN64                                                                               |      | 112.58 | 0.14  | -0.00 |           |     |        |        |       |
| D:SER54                                                                               |      | 79.25  | 9.66  | 0.15  | G:MAN1094 |     | 291.56 | 44.25  | -1.07 |
| D:GLY55                                                                               |      | 40.15  | 0.00  | 0.00  |           |     |        |        |       |
| D:ASP56                                                                               |      | 82.09  | 30.40 | 0.18  |           |     |        |        |       |

\*. D: Disulfide bond, H: Hydrogen bond, S: Salt bridge.

ASA: Accessible Surface Area, Å<sup>2</sup>, BSA: Buried Surface Area, Å<sup>2</sup>, ΔiG: Solvation energy effect, kcal/mol, |||||: Buried area percentage, one bar per 10%.

| 35022    | HSD* | ASA    | BSA   | $\Delta iG$ | gp120     | HSD | ASA    | BSA   | $\Delta iG$ |
|----------|------|--------|-------|-------------|-----------|-----|--------|-------|-------------|
| D:PRO72D |      | 100.81 | 2.52  | -0.03       | G:NAG1234 |     | 364.49 | 2.64  | -0.03       |
| D:VAL72C |      | 88.44  | 0.84  | 0.01        | G:NAG1235 |     | 364.33 | 52.98 | -1.74       |
| D:PRO72D |      | 100.81 | 12.83 | -0.15       |           |     |        |       |             |
| D:VAL72E |      | 95.12  | 21.29 | 0.10        |           |     |        |       |             |

**Light chain residues interacting with gp120 glycans (interactive partners are shaded)**

| 35022   | HSD | ASA    | BSA   | $\Delta iG$ | gp120     | HSD | ASA    | BSA   | $\Delta iG$ |
|---------|-----|--------|-------|-------------|-----------|-----|--------|-------|-------------|
| E:HIS93 | H   | 185.68 | 48.93 | 0.03        | G:BMA1090 | H   | 290.20 | 51.57 | -0.37       |
| E:ASN94 |     | 129.52 | 10.53 | -0.04       |           |     |        |       |             |
| E:HIS93 |     | 185.68 | 46.93 | 0.38        | G:MAN1091 |     | 291.06 | 49.91 | -1.43       |
| E:HIS93 |     | 185.68 | 8.20  | -0.08       | G:MAN1092 | H   | 291.10 | 52.50 | -0.66       |
| E:ASN94 | H   | 129.52 | 50.11 | -0.48       |           |     |        |       |             |
| E:ASN94 |     | 129.52 | 43.33 | -0.57       | G:MAN1093 |     | 291.76 | 44.67 | -1.35       |
| E:SER95 |     | 60.35  | 0.34  | 0.01        |           |     |        |       |             |

\*. D: Disulfide bond, H: Hydrogen bond, S: Salt bridge.

ASA: Accessible Surface Area,  $\text{\AA}^2$ , BSA: Buried Surface Area,  $\text{\AA}^2$ ,  $\Delta iG$ : Solvation energy effect, kcal/mol, ||||: Buried area percentage, one bar per 10%.

## Supplementary Table 4 | PGT122 interface with HIV-1 Env.

## a. PGT122 heavy chain (chain H) and light chain (chain L) interface with gp120 (chain G)

| Hydrogen bonds |               |          |                |      |               |          |              |
|----------------|---------------|----------|----------------|------|---------------|----------|--------------|
| Type           | gp120         | Dist.[Å] | PGT122         | Type | gp120         | Dist.[Å] | PGT122       |
| H*             | G:ARG327[NH2] | 3.42     | H:TYR100B[O]   | H    | G:THR135[O]   | 2.42     | L:ARG94[NE]  |
| H              | G:ARG327[NE]  | 3.36     | H:GLU100I[OE1] | H    | G:ILE322[O]   | 3.16     | L:ARG94[NH1] |
| H              | G:GLN328[N]   | 3.29     | H:GLU100I[OE2] | H    | G:GLY324[O]   | 2.60     | L:ARG94[NH1] |
| H              | G:ARG327[NE]  | 3.36     | H:GLU100I[OE1] | H    | G:ASP325[OD1] | 2.68     | L:SER30[N]   |
|                |               |          |                | H    | G:ASP325[OD1] | 2.95     | L:SER30[OG]  |
|                |               |          |                | H    | G:ASP325[OD1] | 2.80     | L:SER93[OG]  |

## List of heavy chain-gp120 interface residues (the residues on each row are not matched interactive partners)

| gp120    | HSD* | ASA    | BSA   | ΔiG   | PGT122    | HSD | ASA    | BSA    | ΔiG   |
|----------|------|--------|-------|-------|-----------|-----|--------|--------|-------|
| G:ASN137 |      | 123.15 | 1.70  | -0.02 | H:TYR100B | H   | 139.30 | 66.62  | 0.57  |
| G:THR139 |      | 89.34  | 2.51  | -0.01 | H:GLY100C |     | 29.03  | 7.47   | 0.08  |
| G:ASP141 |      | 125.06 | 0.61  | -0.01 | H:VAL100D |     | 88.88  | 34.67  | 0.55  |
| G:MET150 |      | 82.97  | 8.11  | 0.33  | H:ALA100F |     | 91.59  | 3.32   | 0.05  |
| G:ASP325 |      | 109.50 | 35.59 | 0.02  | H:PHE100G |     | 159.25 | 111.47 | 1.57  |
| G:ILE326 |      | 52.34  | 10.65 | -0.12 | H:LYS100H |     | 166.63 | 8.38   | 0.10  |
| G:ARG327 | HS   | 131.02 | 76.40 | -0.25 | H:GLU100I | HS  | 64.86  | 54.78  | -0.50 |
| G:GLN328 | H    | 104.59 | 55.71 | -0.12 | H:PHE100K |     | 110.10 | 1.55   | 0.02  |
| G:ALA329 |      | 6.63   | 0.61  | -0.01 |           |     |        |        |       |
| G:HIS330 |      | 41.10  | 18.00 | -0.05 |           |     |        |        |       |
| G:THR415 |      | 80.97  | 31.04 | 0.47  |           |     |        |        |       |
| G:PRO417 |      | 73.74  | 25.67 | 0.40  |           |     |        |        |       |

## List of light chain-gp120 interface residues (the residues on each row are not matched interactive partners)

| gp120     | HSD* | ASA    | BSA   | ΔiG   | PGT122   | HSD | ASA    | BSA    | ΔiG   |
|-----------|------|--------|-------|-------|----------|-----|--------|--------|-------|
| G:VAL134  |      | 15.62  | 3.68  | 0.06  | L:LEU28  |     | 75.20  | 24.09  | 0.18  |
| G:THR135  | H    | 128.22 | 67.20 | 0.77  | L:GLY29  |     | 8.25   | 8.01   | 0.13  |
| G:ASN136  |      | 70.11  | 25.75 | 0.23  | L:SER30  | H   | 62.08  | 13.05  | 0.02  |
| G:ASN137  |      | 123.15 | 68.20 | 0.14  | L:PHE67C |     | 139.10 | 58.57  | 0.84  |
| G:ILE138  |      | 121.22 | 1.51  | 0.02  | L:ASP92  |     | 12.79  | 0.50   | -0.01 |
| G:ASP321A |      | 84.62  | 2.96  | 0.03  | L:SER93  | H   | 81.90  | 27.48  | -0.17 |
| G:ILE322  | H    | 26.29  | 20.49 | -0.19 | L:ARG94  | H   | 157.44 | 141.21 | -1.53 |
| G:ILE323  |      | 97.31  | 28.13 | 0.38  | L:ARG95  |     | 110.87 | 19.10  | -0.38 |
| G:GLY324  | H    | 62.68  | 61.10 | 0.21  | L:PRO95A |     | 108.78 | 26.57  | 0.41  |
| G:ASP325  | H    | 109.50 | 63.14 | -0.45 | L:THR95B |     | 60.91  | 5.62   | -0.06 |
| G:ILE326  |      | 52.34  | 13.09 | 0.16  |          |     |        |        |       |

## b. PGT122 heavy chain (chain H) and light chain (chain L) interface with gp120 glycans (chain G)

| Hydrogen bonds |                |          |               |    |               |          |               |
|----------------|----------------|----------|---------------|----|---------------|----------|---------------|
|                | PGT122         | Dist.[Å] | gp120         |    | PGT122        | Dist.[Å] | gp120         |
| 1              | H:THR100L[OG1] | 3.06     | G:NAG1138[O6] | 11 | L:THR95B[OG1] | 3.38     | G:NAG1137[N2] |
| 2              | H:ASN58[ND2]   | 2.96     | G:NAG1138[O7] | 12 | L:ASN51[ND2]  | 2.95     | G:MAN1338[O3] |
| 3              | H:ARG99[NE]    | 3.73     | G:MAN1140[O4] | 13 | L:GLY67[N]    | 3.37     | G:MAN1338[O3] |
| 4              | H:ARG99[NH2]   | 3.28     | G:MAN1140[O3] | 14 | L:ASN51[ND2]  | 2.79     | G:MAN1338[O4] |
| 5              | H:TYR33[OH]    | 3.14     | G:MAN1140[O2] | 15 | L:ASN50[ND2]  | 3.49     | G:MAN1338[O6] |
| 6              | H:GLY100C[O]   | 3.89     | G:NAG1332[O6] | 16 | L:ASN52[ND2]  | 3.83     | G:MAN1339[O2] |
| 7              | H:ARG100[NH2]  | 3.89     | G:MAN1337[O2] |    |               |          |               |
| 8              | H:ARG100[NH1]  | 3.35     | G:MAN1337[O5] |    |               |          |               |
| 9              | H:ARG100[NH2]  | 3.22     | G:MAN1337[O6] |    |               |          |               |
| 10             | H:ARG100[NE]   | 3.17     | G:MAN1338[O4] |    |               |          |               |

\*. D: Disulfide bond, H: Hydrogen bond, S: Salt bridge.

ASA: Accessible Surface Area, Å<sup>2</sup>, BSA: Buried Surface Area, Å<sup>2</sup>, ΔiG: Solvation energy effect, kcal/mol, ||||: Buried area percentage, one bar per 10%.



| Heavy chain residues interacting with gp120 glycans (interactive partners are shaded) |      |        |       |             |           |     |        |        |             |
|---------------------------------------------------------------------------------------|------|--------|-------|-------------|-----------|-----|--------|--------|-------------|
| PGT122                                                                                | HSD* | ASA    | BSA   | $\Delta$ iG | gp120     | HSD | ASA    | BSA    | $\Delta$ iG |
| H:ASN58                                                                               |      | 82.39  | 3.34  | -0.04       | G:NAG1137 |     | 363.36 | 64.91  | -1.28       |
| H:PHE100K                                                                             |      | 110.10 | 40.05 | 0.64        |           |     |        |        |             |
| H:THR100L                                                                             |      | 71.33  | 13.33 | -0.15       |           |     |        |        |             |
| H:TYR50                                                                               |      | 32.44  | 9.89  | -0.11       | G:NAG1138 | H   | 361.16 | 67.39  | -1.08       |
| H:ASN58                                                                               | H    | 82.39  | 28.86 | -0.24       |           |     |        |        |             |
| H:PHE100K                                                                             |      | 110.10 | 0.15  | 0.00        |           |     |        |        |             |
| H:THR100L                                                                             | H    | 71.33  | 23.27 | -0.14       |           |     |        |        |             |
| H:TYR50                                                                               |      | 32.44  | 2.21  | -0.03       | G:BMA1139 |     | 292.42 | 52.46  | -0.60       |
| H:SER54                                                                               |      | 102.04 | 1.96  | -0.02       |           |     |        |        |             |
| H:GLY55                                                                               |      | 70.18  | 7.22  | -0.04       |           |     |        |        |             |
| H:ASP56                                                                               |      | 55.22  | 39.30 | 0.01        |           |     |        |        |             |
| H:THR57                                                                               |      | 50.88  | 1.31  | -0.01       |           |     |        |        |             |
| H:TYR33                                                                               | H    | 39.27  | 19.22 | -0.22       | G:MAN1140 | H   | 288.49 | 124.68 | -2.12       |
| H:ASP56                                                                               |      | 55.22  | 15.93 | 0.02        |           |     |        |        |             |
| H:HIS97                                                                               |      | 81.98  | 2.93  | 0.02        |           |     |        |        |             |
| H:ARG99                                                                               | H    | 137.04 | 37.65 | -0.72       |           |     |        |        |             |
| H:TRP100J                                                                             |      | 93.30  | 12.76 | 0.17        |           |     |        |        |             |
| H:THR100L                                                                             |      | 71.33  | 24.31 | 0.24        |           |     |        |        |             |
| H:GLY100C                                                                             |      | 29.03  | 1.81  | -0.02       | G:NAG1331 |     | 363.56 | 46.79  | -0.22       |
| H:VAL100D                                                                             |      | 88.88  | 32.79 | 0.41        |           |     |        |        |             |
| H:ILE100A                                                                             |      | 78.65  | 11.05 | 0.18        | G:NAG1332 | H   | 355.60 | 104.64 | -1.96       |
| H:TYR100B                                                                             |      | 139.30 | 8.08  | -0.06       |           |     |        |        |             |
| H:GLY100C                                                                             | H    | 29.03  | 14.32 | -0.14       |           |     |        |        |             |
| H:VAL100D                                                                             |      | 88.88  | 21.43 | 0.24        |           |     |        |        |             |
| H:VAL100E                                                                             |      | 71.06  | 21.76 | 0.35        |           |     |        |        |             |
| H:ARG100                                                                              |      | 126.64 | 6.29  | -0.07       | G:BMA1333 |     | 287.56 | 71.78  | -1.82       |
| H:ILE100A                                                                             |      | 78.65  | 45.03 | 0.30        |           |     |        |        |             |
| H:TYR100B                                                                             |      | 139.30 | 8.75  | 0.03        |           |     |        |        |             |
| H:GLY100C                                                                             |      | 29.03  | 5.44  | -0.06       |           |     |        |        |             |
| H:VAL100E                                                                             |      | 71.06  | 0.17  | 0.00        |           |     |        |        |             |
| H:ILE100A                                                                             |      | 78.65  | 12.91 | 0.21        | G:MAN1334 |     | 289.35 | 14.25  | -0.37       |
| H:ARG100                                                                              | H    | 126.64 | 26.73 | -0.73       | G:MAN1337 | H   | 290.72 | 69.38  | -0.95       |
| H:ILE100A                                                                             |      | 78.65  | 7.44  | -0.08       |           |     |        |        |             |
| H:TYR100B                                                                             |      | 139.30 | 19.66 | 0.14        |           |     |        |        |             |
| H:ARG100                                                                              | H    | 126.64 | 36.72 | -0.38       | G:MAN1338 | H   | 290.85 | 50.03  | -0.94       |
| H:ILE100A                                                                             |      | 78.65  | 2.22  | -0.03       |           |     |        |        |             |

| Light chain residues interacting with gp120 glycans (interactive partners are shaded) |      |        |       |             |           |     |        |        |             |
|---------------------------------------------------------------------------------------|------|--------|-------|-------------|-----------|-----|--------|--------|-------------|
| PGT122                                                                                | HSD* | ASA    | BSA   | $\Delta$ iG | gp120     | HSD | ASA    | BSA    | $\Delta$ iG |
| L:TRP91                                                                               |      | 109.68 | 21.87 | 0.35        | G:NAG1137 | H   | 363.36 | 114.45 | -3.21       |
| L:ASP92                                                                               |      | 12.79  | 9.29  | -0.07       |           |     |        |        |             |
| L:SER93                                                                               |      | 81.90  | 10.84 | 0.14        |           |     |        |        |             |
| L:ARG94                                                                               |      | 157.44 | 0.00  | 0.00        |           |     |        |        |             |
| L:ARG95                                                                               |      | 110.87 | 8.22  | -0.09       |           |     |        |        |             |
| L:PRO95A                                                                              |      | 108.78 | 9.06  | 0.14        |           |     |        |        |             |
| L:THR95B                                                                              | H    | 60.91  | 28.01 | -0.27       |           |     |        |        |             |
| L:TRP96                                                                               |      | 223.52 | 0.31  | 0.00        | G:NAG1138 |     | 361.16 | 0.24   | -0.00       |
| L:ARG94                                                                               |      | 157.44 | 16.23 | -0.36       | G:NAG1156 |     | 362.08 | 16.35  | -0.54       |
| L:ARG95                                                                               |      | 110.87 | 6.55  | -0.07       | G:NAG1157 |     | 363.82 | 6.38   | -0.07       |
| L:GLU25                                                                               |      | 83.84  | 1.35  | -0.02       | G:MAN1159 |     | 289.29 | 1.28   | -0.04       |

\*. D: Disulfide bond, H: Hydrogen bond, S: Salt bridge.

ASA: Accessible Surface Area, Å<sup>2</sup>, BSA: Buried Surface Area, Å<sup>2</sup>,  $\Delta$ iG: Solvation energy effect, kcal/mol, ||||: Buried area percentage, one bar per 10%.

| PGT122   | HSD | ASA    | BSA   | $\Delta iG$ | gp120     | HSD | ASA    | BSA    | $\Delta iG$ |
|----------|-----|--------|-------|-------------|-----------|-----|--------|--------|-------------|
| L:SER30  |     | 62.08  | 10.76 | 0.17        | G:MAN1337 |     | 290.72 | 62.39  | -0.82       |
| L:GLY67  |     | 13.30  | 0.98  | -0.01       |           |     |        |        |             |
| L:SER67A |     | 77.94  | 44.21 | 0.62        |           |     |        |        |             |
| L:PHE67C |     | 139.10 | 7.35  | 0.12        |           |     |        |        |             |
| L:ARG31  |     | 14.38  | 0.98  | -0.01       | G:MAN1338 | H   | 290.85 | 104.08 | -1.04       |
| L:ASN50  | H   | 71.14  | 33.52 | -0.41       |           |     |        |        |             |
| L:ASN51  | H   | 18.57  | 11.39 | -0.05       |           |     |        |        |             |
| L:ASN52  |     | 72.55  | 1.17  | 0.02        |           |     |        |        |             |
| L:ASP53  |     | 60.91  | 0.61  | -0.01       |           |     |        |        |             |
| L:PRO66  |     | 83.14  | 12.23 | 0.20        |           |     |        |        |             |
| L:GLY67  | H   | 13.30  | 3.86  | 0.00        |           |     |        |        |             |
| L:SER67A |     | 77.94  | 14.20 | 0.20        |           |     |        |        |             |
| L:ASN51  |     | 18.57  | 2.74  | 0.03        | G:MAN1339 | H   | 287.69 | 77.17  | -1.13       |
| L:ASN52  | H   | 72.55  | 23.68 | 0.09        |           |     |        |        |             |
| L:ASP53  |     | 60.91  | 5.04  | -0.09       |           |     |        |        |             |
| L:PRO66  |     | 83.14  | 28.74 | 0.46        |           |     |        |        |             |
| L:GLY67  |     | 13.30  | 0.58  | -0.01       |           |     |        |        |             |
| L:SER67A |     | 77.94  | 7.10  | -0.06       |           |     |        |        |             |

\*. D: Disulfide bond, H: Hydrogen bond, S: Salt bridge.

ASA: Accessible Surface Area,  $\text{\AA}^2$ , BSA: Buried Surface Area,  $\text{\AA}^2$ ,  $\Delta iG$ : Solvation energy effect, kcal/mol, ||||: Buried area percentage, one bar per 10%.
